# Supplementary material for: Poly(Thionine)-Modified Screen-Printed Electrodes for CA 19-9 Detection and Its Properties in Raman Spectroscopy
Source: MDPI journal article supplement (doi:10.3390/chemosensors10030092), 2022-02-27
Supplement: s1 [file s1]

## Supplementary Information

### Poly(thionine) modified screen-printed electrodes for CA19-9 detection and its properties in Raman spectroscopy

Y. Castaño-Guerrero<sup>1,2,3</sup>, Y. Romanguera-Barcelay<sup>3,4</sup>, Felismina T.C. Moreira<sup>1,2</sup>, Walter R. Brito<sup>4</sup>, E. Fortunato<sup>5</sup>, M.G.F. Sales<sup>1,2,3,\*</sup>

<sup>1</sup>BioMark@ISEP, Rua Dr. António Bernardino de Almeida, 431, 4249-015, Porto, Portugal;

<sup>2</sup>CEB, Centre of Biological Engineering, University of Minho, Braga, Portugal;

<sup>3</sup>BioMark@UC, Rua Sílvio Lima 3030-790, Coimbra, Portugal;

<sup>4</sup>Department of Physics and Department of Chemistry (LABEL), Federal University of Amazonas, Manaus, 69067-005, Amazonas, Brazil;

<sup>5</sup>CENIMAT|i3N, Departamento de Ciência de Materiais, Faculdade de Ciências e Tecnologia, Universidade NOVA de Lisboa, Lisboa, and CEMOP/UNINOVA, Campus da Caparica, Caparica, Portugal.

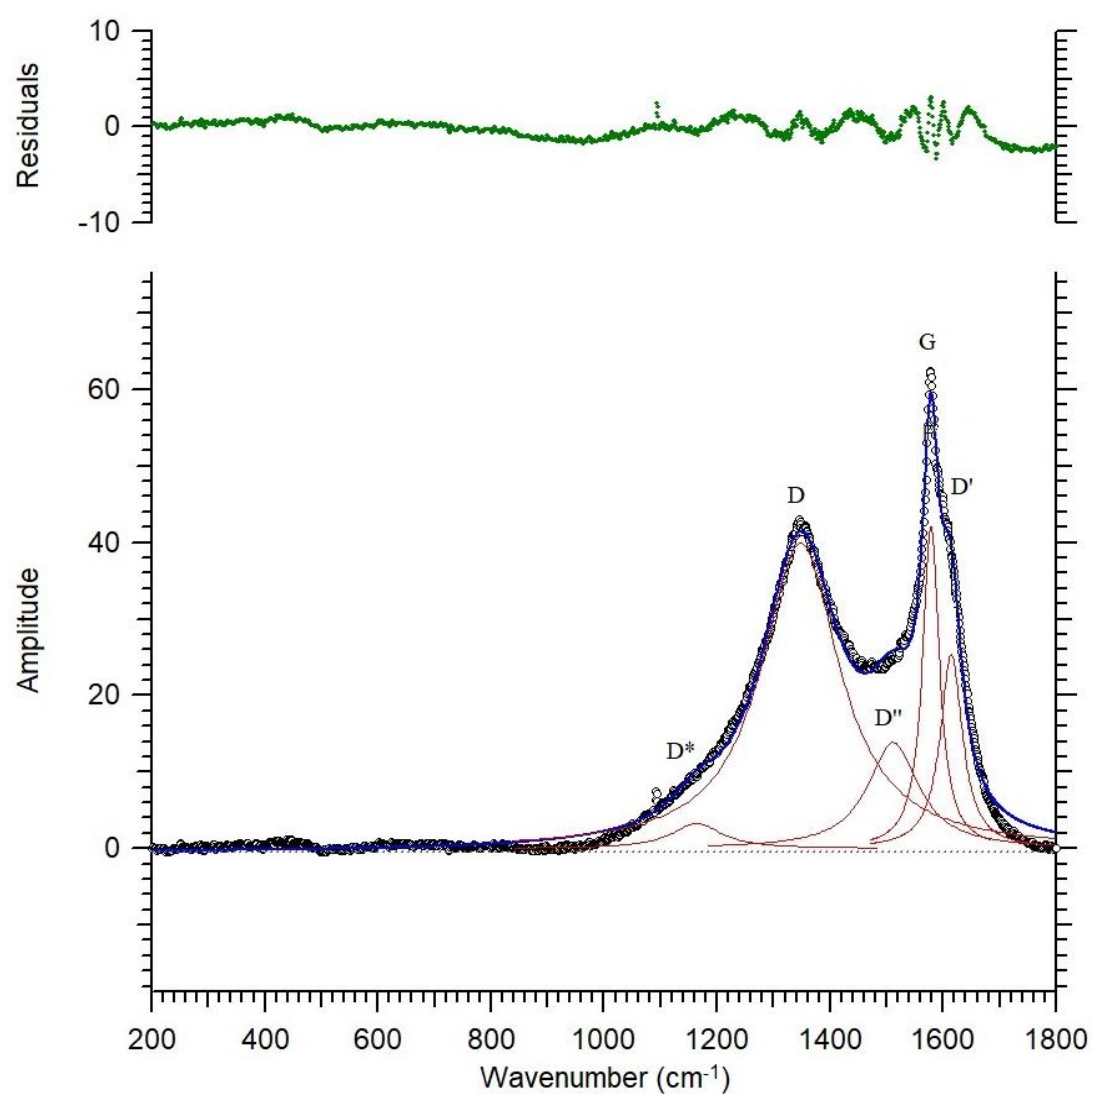

**Figure S1.** Raman spectra of the carbon electrode at room temperature, signaling peaks G, D, D', D'' and D\*.

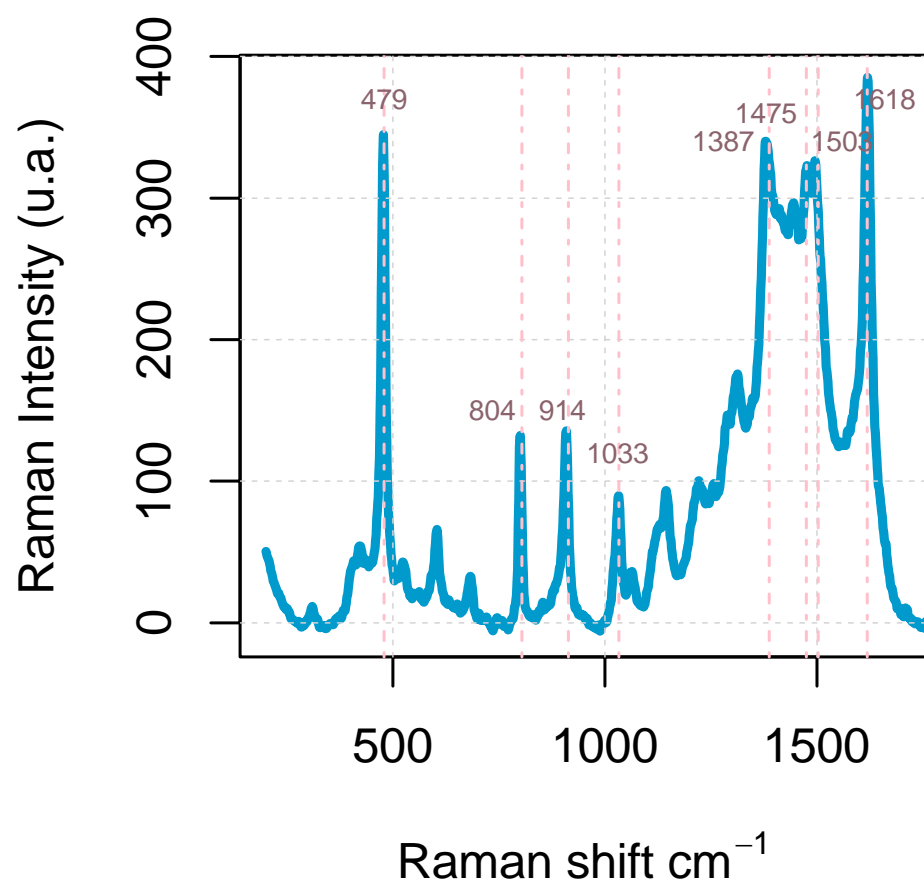

**Figure S2:** SERS spectra of TH powder showing the most relevant peaks.

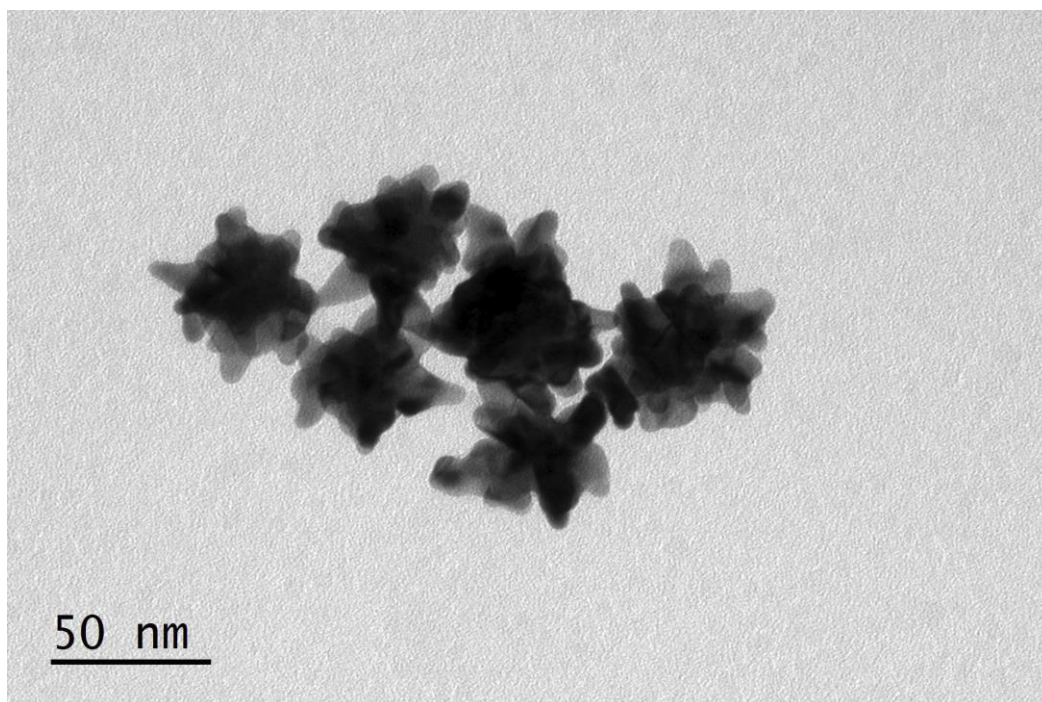

**Figure S3.** TEM images of AuNS.

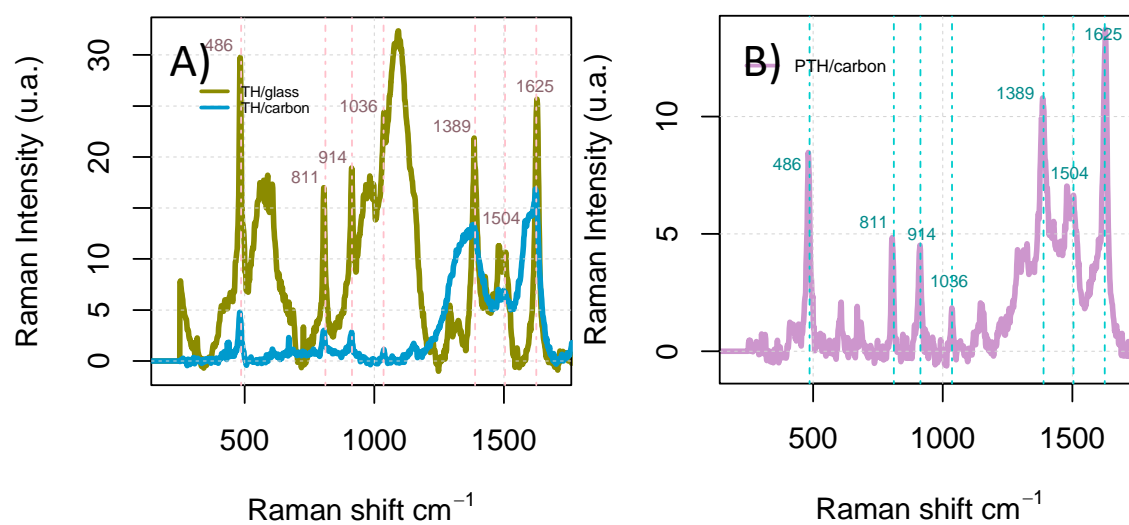

**Figure S4.** Raman spectra of TH, A) (blue) on carbon electrodes and (green) on glass, both substrates drops with TH, B) (pink) spectra of PTH on carbon substrate.

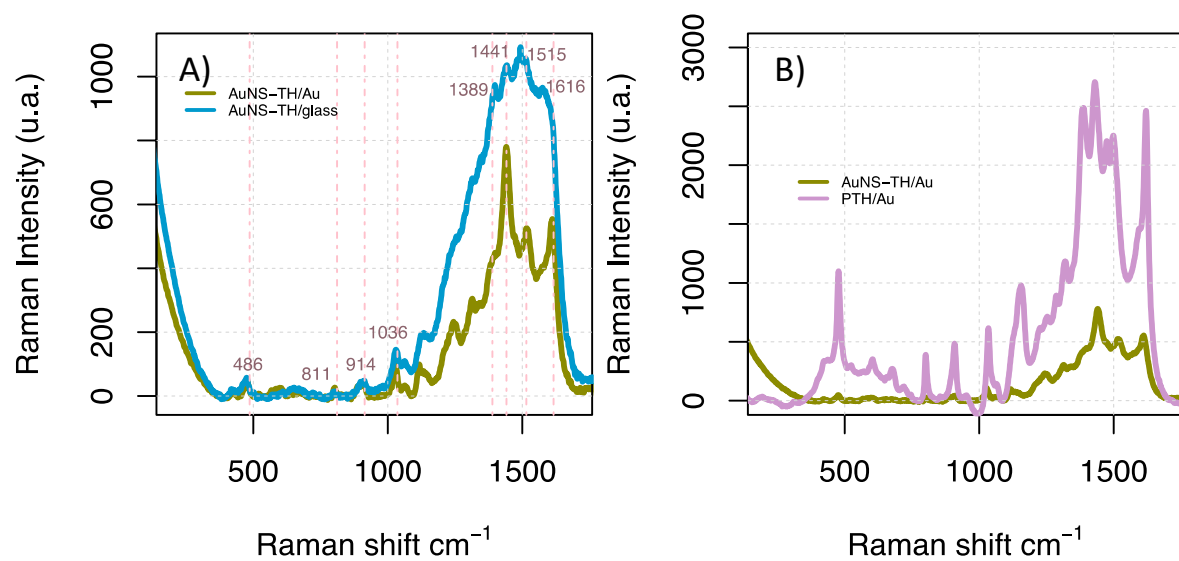

**Figure S5.** SERS spectra of A) TH/AuNS, (blue) on glass and (green) on gold, B) (pink) spectra of PTH on gold substrate.

**Table S1:** Information about ratio between intensities and amplitude of carbon bands, D, D'', and G.

| Carbon band     | Frequency (cm <sup>-1</sup> ) | Intensity, I (a.u)  | FWHM (cm <sup>-1</sup> ) | Area (A) | I <sub>D''</sub> /I <sub>G</sub> | A <sub>D''</sub> /A <sub>G</sub> | I <sub>D</sub> /I <sub>G</sub> | A <sub>D</sub> /A <sub>G</sub> |
|-----------------|-------------------------------|---------------------|--------------------------|----------|----------------------------------|----------------------------------|--------------------------------|--------------------------------|
| D               | 1350                          | 39,76               | 169,34                   | 10575,5  |                                  |                                  |                                |                                |
| D''             | 1512                          | 13,84               | 109,22                   | 2374,9   |                                  |                                  |                                |                                |
| G               | 1579                          | 42,04               | 35,73                    | 2359,7   |                                  |                                  |                                |                                |
|                 |                               |                     |                          |          | 0,33                             | 1,01                             | 0,94                           | 4,48                           |
|                 |                               |                     |                          |          |                                  |                                  |                                |                                |
| Carbon+T H band | Frequency (cm <sup>-1</sup> ) | Intensity (I) (a.u) | FWHM (cm <sup>-1</sup> ) | Area (A) | I <sub>D''</sub> /I <sub>G</sub> | A <sub>D''</sub> /A <sub>G</sub> | I <sub>D</sub> /I <sub>G</sub> | A <sub>D</sub> /A <sub>G</sub> |
| D               | 1350                          | 72,68               | 190,68                   | 21769,3  |                                  |                                  |                                |                                |
| D''             | 1504                          | 30,62               | 101,12                   | 4871,44  |                                  |                                  |                                |                                |
| G               | 1580                          | 70,18               | 44,79                    | 4937,025 |                                  |                                  |                                |                                |
|                 |                               |                     |                          |          | 0,43                             | 0,99                             | 1,04                           | 4,41                           |
